# Supplementary material for: Comparative Study of Transcriptomics-Based Scoring Metrics for the Epithelial-Hybrid-Mesenchymal Spectrum
Source: PubMed Central journal article supplement (PMC7100584; doi:10.3389/fbioe.2020.00220), 2020-03-20
Supplement: Data_Sheet_1.pdf [file Data_Sheet_1.pdf]

## Supplementary Figures

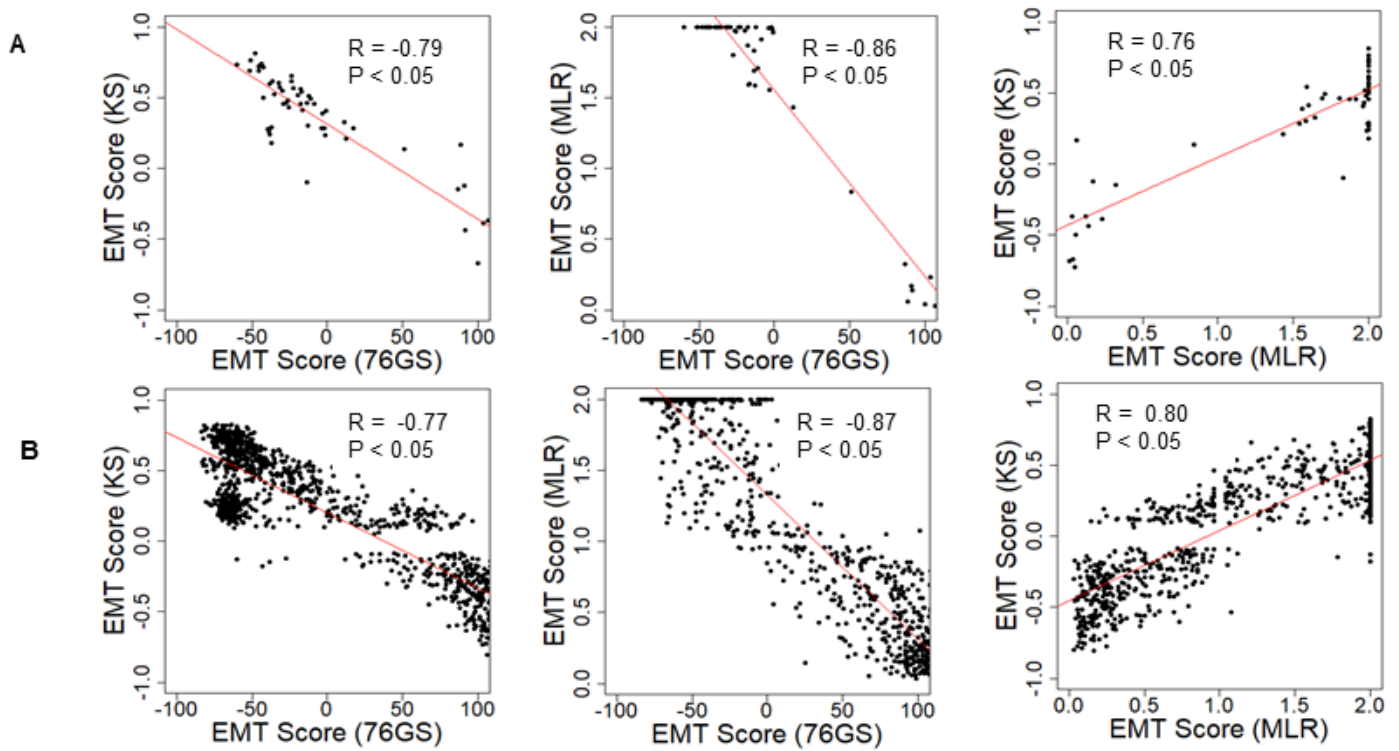

**Figure S1:** Scatter plot depicting the correlation between the EMT scores of cancer cell line samples, calculated via three EMT scoring methods. Each pairwise relation is estimated by a linear regression line (red), Spearman's correlation coefficient ( $R$ ) and  $p$ -value ( $p$ ) reported in each plot. **A)** NCI60 dataset **B)** CCLE dataset

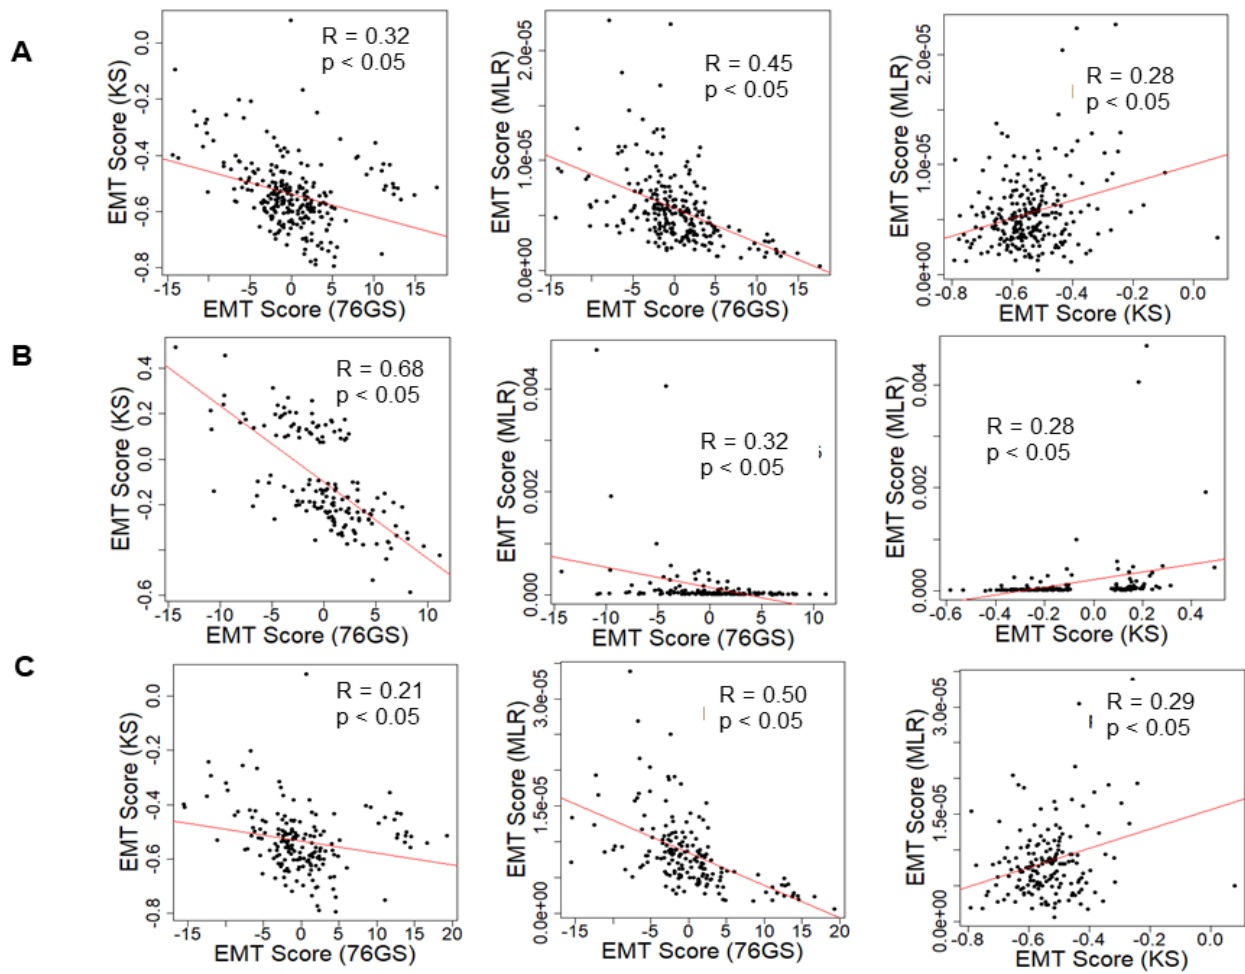

**Figure S2:** Scatter plot depicting the correlation between the EMT scores of different tumor types in TCGA dataset, calculated via three methods. Each pairwise relation is estimated by a linear regression line (red), Pearson's correlation coefficient (R) and p-value (p) reported in each plot. (A) Lung squamous cell cancer (B) Colon adenocarcinoma (C) Colon and rectal adenocarcinoma

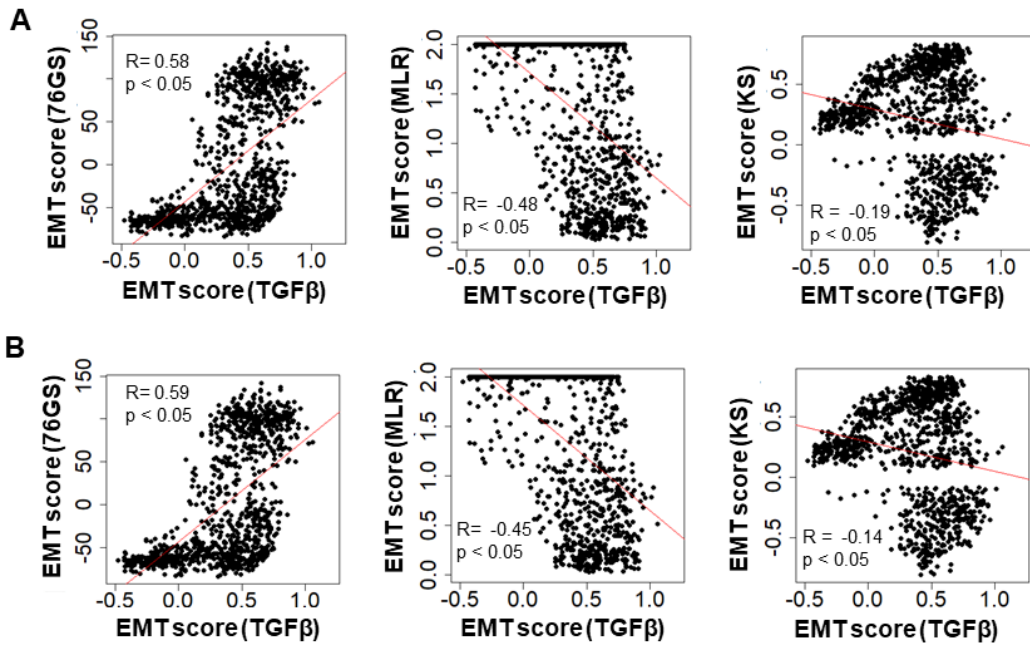

**Figure S3:** EMT score correlation with  $TGF\beta$  specific EMT scoring method in CCLE dataset (A) Pearson's correlation coefficient (B) Spearman's correlation. Correlation coefficient ( $R$ ) and  $p$ -value ( $p$ ) reported in each plot

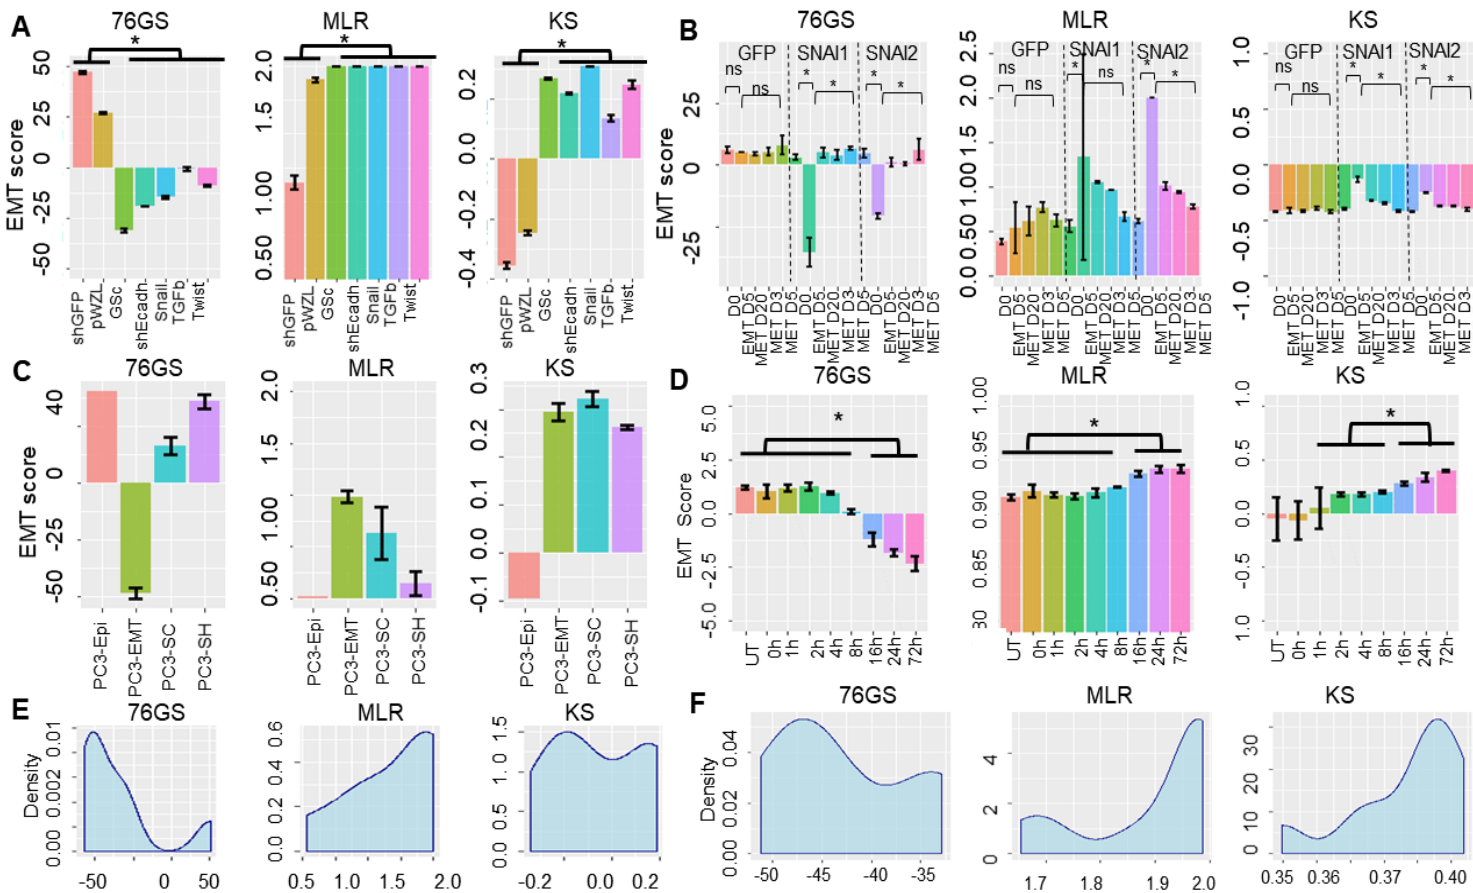

**Figure S4:** EMT scores of different EMT time series datasets (A) GSE24202- EMT induction by different EMT regulators (B) GSE84002- EMT and MET induction over time by GFP, SNAI1 and SNAI2. (C) GSE43489 -EMT/MET induction in PC3 cell line. (D) GSE17708 – EMT induction over time (E) GSE55470- CTCs from breast cancer patients (F) GSE50991- CTCs from ex vivo lung cancer model (\*  $p < 0.05$ ,  $n=3$ , two-tailed Student's  $t$ -test; error bars represent standard deviation for  $n = 3$ ). E and F represent kernel density plots.

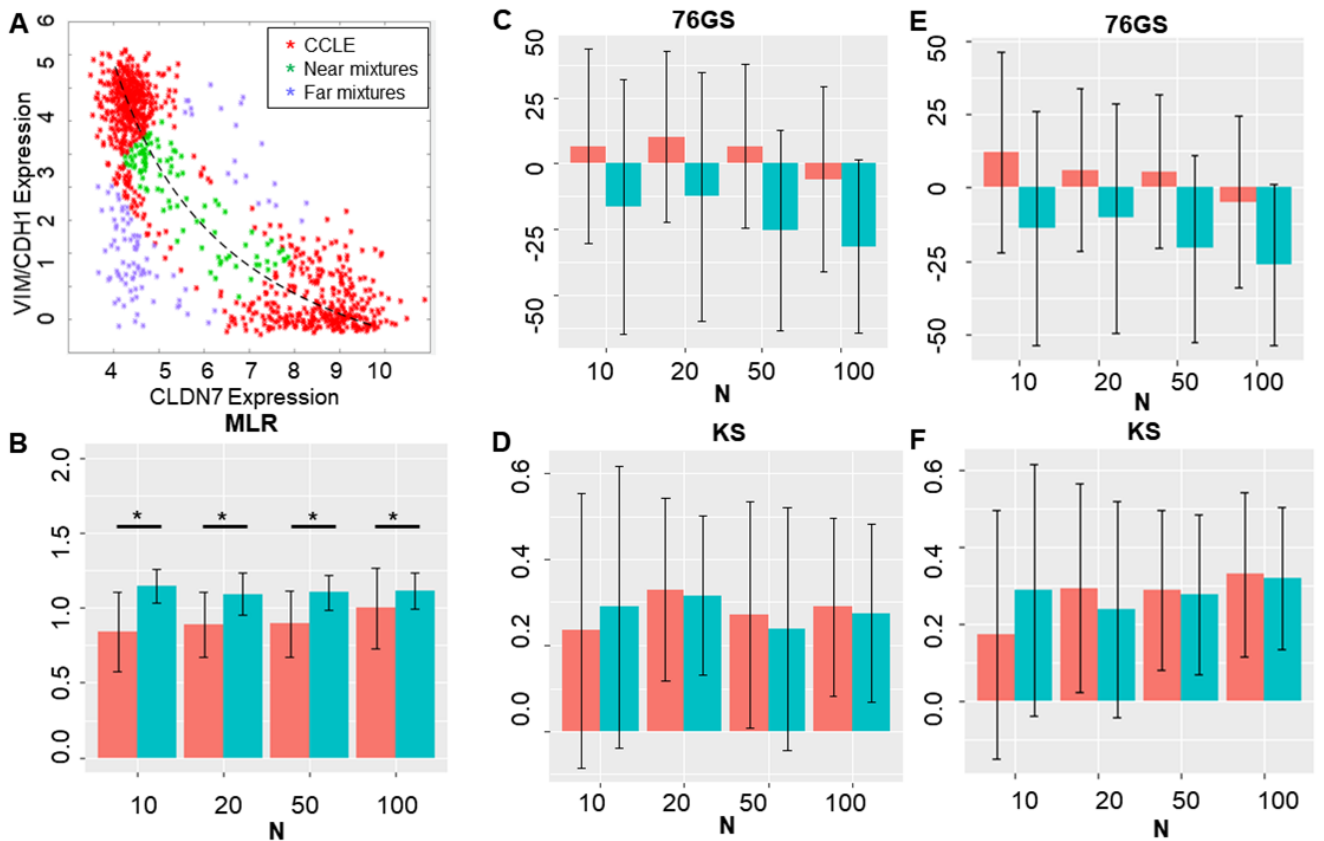

**Figure S5:** (A) Scatter plot showing 100 farthest and closest samples based on the distance from mixture curve defined by median of 35 most pure E and pure M CCLE samples. (B) MLR EMT score for N(10,20,50,100) closest and farthest hybrid samples from median mixture curve. Bar plots showing EMT scores of N (10, 20, 50, 100) closest and farthest hybrid samples from mean mixture curve. (C) 76GS EMT score (D) KS EMT score. Bar plots showing EMT scores of N (10, 20, 50, 100) closest and farthest hybrid samples from median mixture curve. (E) 76GS EMT score (F) KS EMT score. (\*  $p < 0.05$ , N=10, 20, 50 & 100, two-tailed Student's t-test; error bars represent standard deviation for the given value of N)
